# Supplementary material for: Multigroup prediction in lung cancer patients and comparative controls using signature of volatile organic compounds in breath samples
Source: PLoS One. 2022 Nov 30;17(11):e0277431. doi: 10.1371/journal.pone.0277431 (PMC9710764; doi:10.1371/journal.pone.0277431)
Supplement: S2 Table — (XLSX) [file pone.0277431.s003.xlsx]

## Sheet: Table S2
	Supplementary Table S2. Statistical significance values computed through Boot-SVM-RFE for all the VOCs used in the study for all patient class combinations.
	Cancer (156) vs Control (193)				Cancer (156) vs Benign (65)				Benign (65) vs Control (193)				Benign + Cancer (221) vs Control (193)				Control + Benign vs Cancer
VOCs	Weights	P-value	AdjPval	FDR	Weights	P-value	AdjPval	FDR	Weights	P-value	AdjPval	FDR	Weights	P-value	AdjPval	FDR	Weights	P-value	AdjPval	FDR
CH2O	0.334296	1	1	1	0.428296	1	1	1	0.365481	1	1	1	0.306593	1	1	1	0.403037	1	1	1
C2H4O	0.225185	1	1	1	0.247704	1	1	1	0.203926	1	1	1	0.203111	1	1	1	0.17637	1	1	1
C3H6O	0.155185	1	1	1	0.201333	1	1	1	0.160519	1	1	1	0.152815	1	1	1	0.149185	1	1	1
C4H8O	0.69837	6.32359e-84	1.5809e-82	5.69124e-83	0.590815	4.82429e-32	8.2013e-31	1.18414e-31	0.527926	7.55678e-08	1.05795e-06	1.45738e-07	0.615185	4.54574e-74	1.04552e-72	2.4547e-73	0.726593	1.42499e-81	3.56246e-80	1.28249e-80
C5H10O	0.333704	1	1	1	0.42563	1	1	1	0.38	1	1	1	0.287407	1	1	1	0.467778	0.999956	1	1
C6H12O	0.656	1.27824e-50	2.42866e-49	3.83473e-50	0.680222	1.76944e-46	3.53888e-45	5.97186e-46	0.582	1.48798e-16	2.23197e-15	3.09042e-16	0.595333	4.33934e-26	7.37687e-25	1.06511e-25	0.688593	4.22211e-46	8.44422e-45	1.42496e-45
C7H14O	0.806296	1.07476e-75	2.257e-74	4.14552e-75	0.715556	2.025e-56	4.455e-55	9.11251e-56	0.743926	2.73184e-57	5.73686e-56	1.05371e-56	0.770519	3.28711e-71	7.23163e-70	1.4792e-70	0.722889	3.92585e-51	8.24429e-50	1.51426e-50
C8H16O	0.598	1.14308e-24	1.82893e-23	2.57194e-24	0.584074	1.8476e-16	2.95616e-15	4.15709e-16	0.586074	2.87693e-19	4.60309e-18	6.4731e-19	0.579111	6.96019e-15	9.74426e-14	1.34232e-14	0.543185	5.03408e-06	7.55112e-05	1.04554e-05
C9H18O	0.418963	1	1	1	0.518222	0.0411677	0.494012	0.0694705	0.471556	0.999869	1	1	0.395852	1	1	1	0.447704	1	1	1
C10H20O	0.493704	0.795957	1	1	0.343926	1	1	1	0.582667	6.88524e-32	1.3082e-30	2.06557e-31	0.551111	3.01183e-22	4.81893e-21	6.77662e-22	0.424296	1	1	1
C11H22O	0.780296	1.00454e-81	2.41089e-80	6.78062e-81	0.593852	6.62598e-16	9.93897e-15	1.37617e-15	0.855852	7.75612e-83	1.93903e-81	6.98051e-82	0.81837	9.57105e-84	2.39276e-82	8.61395e-83	0.668148	1.13334e-55	2.49334e-54	5.10001e-55
C12H24O	0.509926	0.170366	1	0.306659	0.799556	7.13874e-73	1.78468e-71	6.42486e-72	0.683407	6.26895e-61	1.44186e-59	3.38523e-60	0.585704	3.68734e-30	7.00595e-29	1.09729e-29	0.523333	0.0498472	0.648013	0.0897249
C13H26O	0.603111	2.06817e-28	3.7227e-27	5.58405e-28	0.721556	1.78977e-53	3.75851e-52	6.90339e-53	0.604593	5.69594e-21	9.68309e-20	1.39809e-20	0.576593	3.80351e-13	4.94457e-12	6.84633e-13	0.630815	5.22615e-29	9.40707e-28	1.41106e-28
C4HO8O2	0.949926	6.32359e-84	1.5809e-82	5.69124e-83	0.732593	1.7551e-68	4.21224e-67	1.18469e-67	0.898815	6.43864e-84	1.67405e-82	8.69216e-83	0.944889	6.32359e-84	1.64413e-82	8.53685e-83	0.932074	6.81689e-84	1.84056e-82	1.21315e-82
C2H4O2	0.790593	6.77227e-79	1.55762e-77	3.65703e-78	0.651333	2.34906e-32	4.2283e-31	6.34246e-32	0.740889	1.6299e-70	3.91177e-69	1.10019e-69	0.730519	1.69909e-65	3.39818e-64	5.73443e-65	0.743926	3.76412e-66	8.65748e-65	2.03263e-65
C3H4O	0.609481	2.60806e-26	4.43371e-25	6.40161e-26	0.653852	9.46517e-34	1.79838e-32	2.83955e-33	0.619852	3.02333e-25	5.44199e-24	8.16298e-25	0.585481	8.86748e-17	1.33012e-15	1.84171e-16	0.558444	2.00238e-09	3.20381e-08	4.50536e-09
C6H10O2	0.825852	3.18638e-77	7.01003e-76	1.43387e-76	0.881185	3.09477e-78	8.0464e-77	4.17794e-77	0.528741	0.00287293	0.0373481	0.00517128	0.843778	2.1103e-78	5.06473e-77	1.42446e-77	0.968074	8.98632e-84	2.33644e-82	1.21315e-82
C9H16O2	0.726519	6.23766e-56	1.24753e-54	2.10521e-55	0.594741	4.38942e-13	6.14519e-12	8.46531e-13	0.748222	2.68349e-58	5.90368e-57	1.20757e-57	0.767926	1.57821e-67	3.31425e-66	6.0874e-67	0.604963	3.56973e-22	6.06854e-21	8.76206e-22
C3H4O2	0.351852	1	1	1	0.354815	1	1	1	0.385556	1	1	1	0.38563	1	1	1	0.330074	1	1	1
C4H6O2	0.242815	1	1	1	0.344444	1	1	1	0.381481	1	1	1	0.335037	1	1	1	0.325852	1	1	1
C4H6O	0.346815	1	1	1	0.225778	1	1	1	0.215185	1	1	1	0.371185	1	1	1	0.341333	1	1	1
C4H4O2	0.038963	1	1	1	0.0436296	1	1	1	0.0402963	1	1	1	0.041037	1	1	1	0.0466667	1	1	1
C5H8O	0.570593	1.16423e-15	1.74634e-14	2.41802e-15	0.880963	1.87373e-83	5.05906e-82	5.05906e-82	0.696741	1.06119e-54	2.12237e-53	3.5815e-54	0.62637	4.06404e-30	7.31526e-29	1.09729e-29	0.628148	2.01481e-34	3.82813e-33	6.04442e-34
C7H6O	0.352074	1	1	1	0.418741	1	1	1	0.421926	1	1	1	0.366222	1	1	1	0.493556	0.906883	1	1
C7H11O	0.511037	0.0634099	0.887738	0.12229	0.577333	2.74881e-10	3.57345e-09	4.94785e-10	0.497481	0.826321	1	1	0.489259	0.925435	1	1	0.518963	0.0148303	0.207624	0.0286012
C13H22O	0.995481	6.32359e-84	1.5809e-82	5.69124e-83	0.707926	1.52031e-65	3.4967e-64	8.20965e-65	1	6.32359e-84	1.67405e-82	8.69216e-83	0.999556	6.32359e-84	1.64413e-82	8.53685e-83	0.848815	9.35028e-78	2.24407e-76	6.31144e-77
C15H10O	0.074963	1	1	1	0.0819259	1	1	1	0.0768889	1	1	1	0.0754074	1	1	1	0.0871852	1	1	1
